# Supplementary material for: Laser-induced fabrication of highly branched Au@TiO2 nano-dendrites with excellent near-infrared absorption properties
Source: Royal Society of Chemistry journal article supplement (doi:10.1039/c6ra15398d), 2016-01-01
Supplement: c6ra15398d1.pdf [file c6ra15398d1.pdf]

## Electronic Supplementary Information

for

# Laser-induced fabrication of highly branched Au@TiO<sub>2</sub> nano-dendrites with excellent near-infrared absorption properties

Ziyu Wang, Hua Zhang, Linlin Xu, Ziwei Wang, Dameng Wang, Xiangdong Liu and Ming Chen\*

*School of Physics, Shandong University, Jinan 250100, China*

[\\*chenming@sdu.edu.cn](mailto:chenming@sdu.edu.cn)

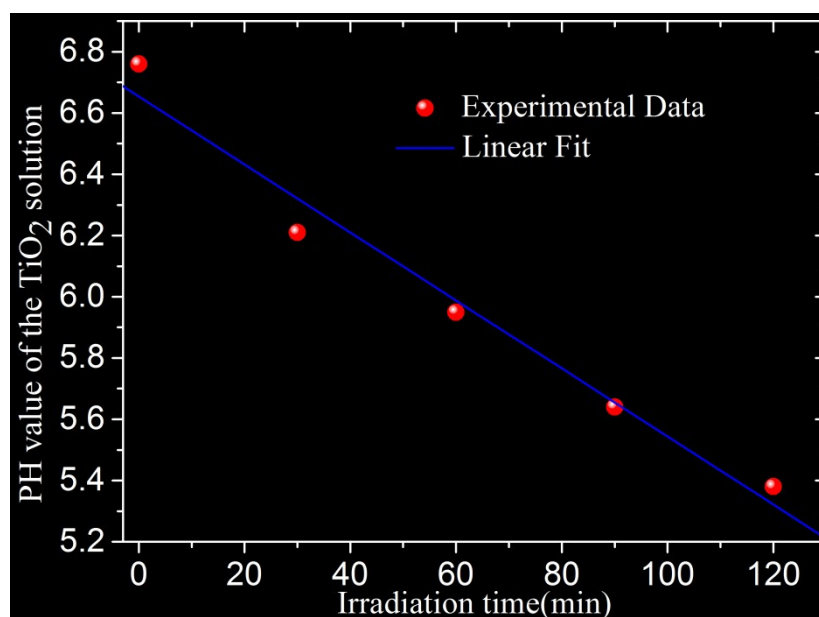

Fig. S1 The PH value of the TiO<sub>2</sub> solution versus the UV-laser irradiation time.

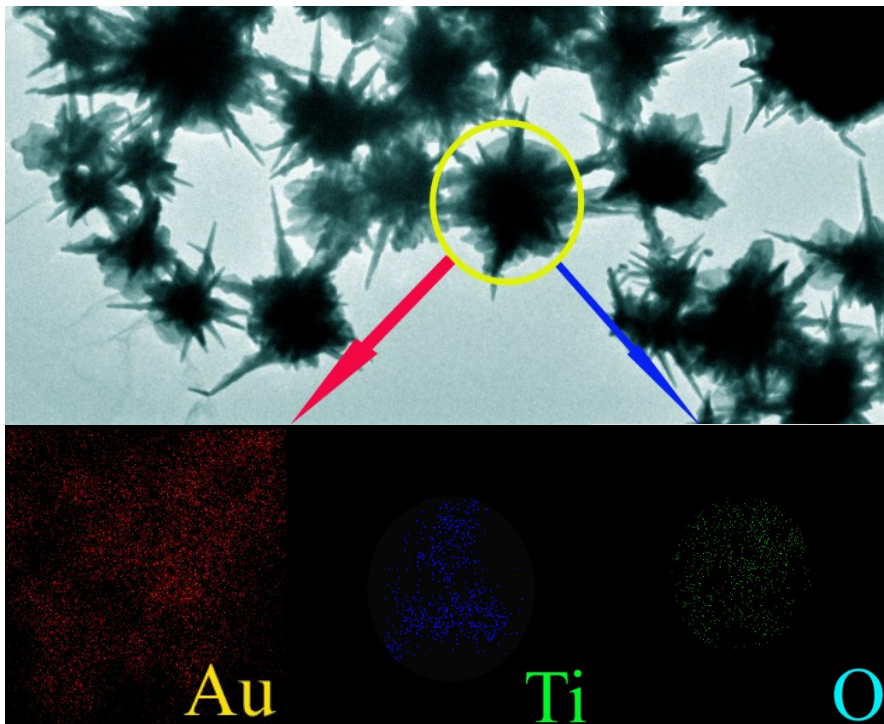

Fig. S2 The typical TEM images of the Au@TiO<sub>2</sub> nano-dendrites by using 100 $\mu$ L HAuCl<sub>4</sub>. The precursors were modified by UV-laser irradiation for 120 min. The below pictures show the elemental mapping images of the representative Au@TiO<sub>2</sub> nano-dendrites.

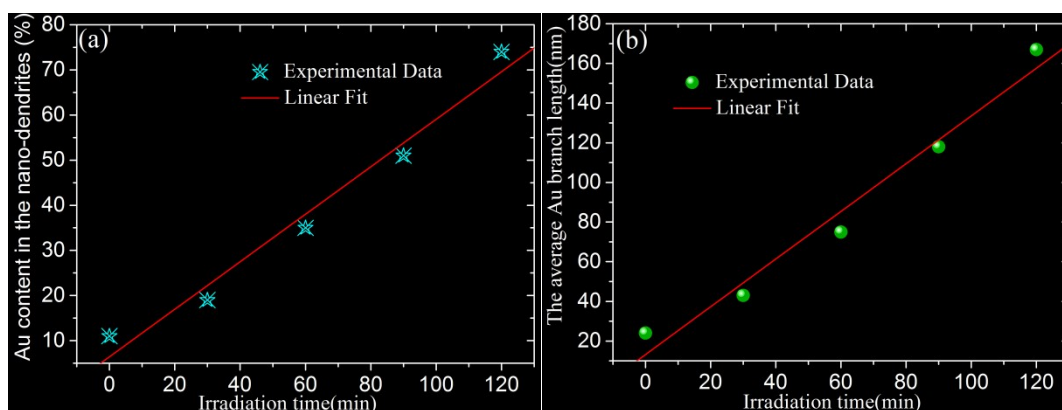

Fig. S3 The structure-evolutions of Au@TiO<sub>2</sub> nan-dendrites obtained by using 100 $\mu$ L HAuCl<sub>4</sub> in each experiment versus UV-laser irradiation time : (a) the average Au branch length and (b) the Au content in the Au@TiO<sub>2</sub> nan-dendrites.
